# Supplementary material for: Leveraging plastomes for comparative analysis and phylogenomic inference within Scutellarioideae (Lamiaceae)
Source: PubMed Central journal article supplement (PMC7205251; doi:10.1371/journal.pone.0232602), 2020-05-07

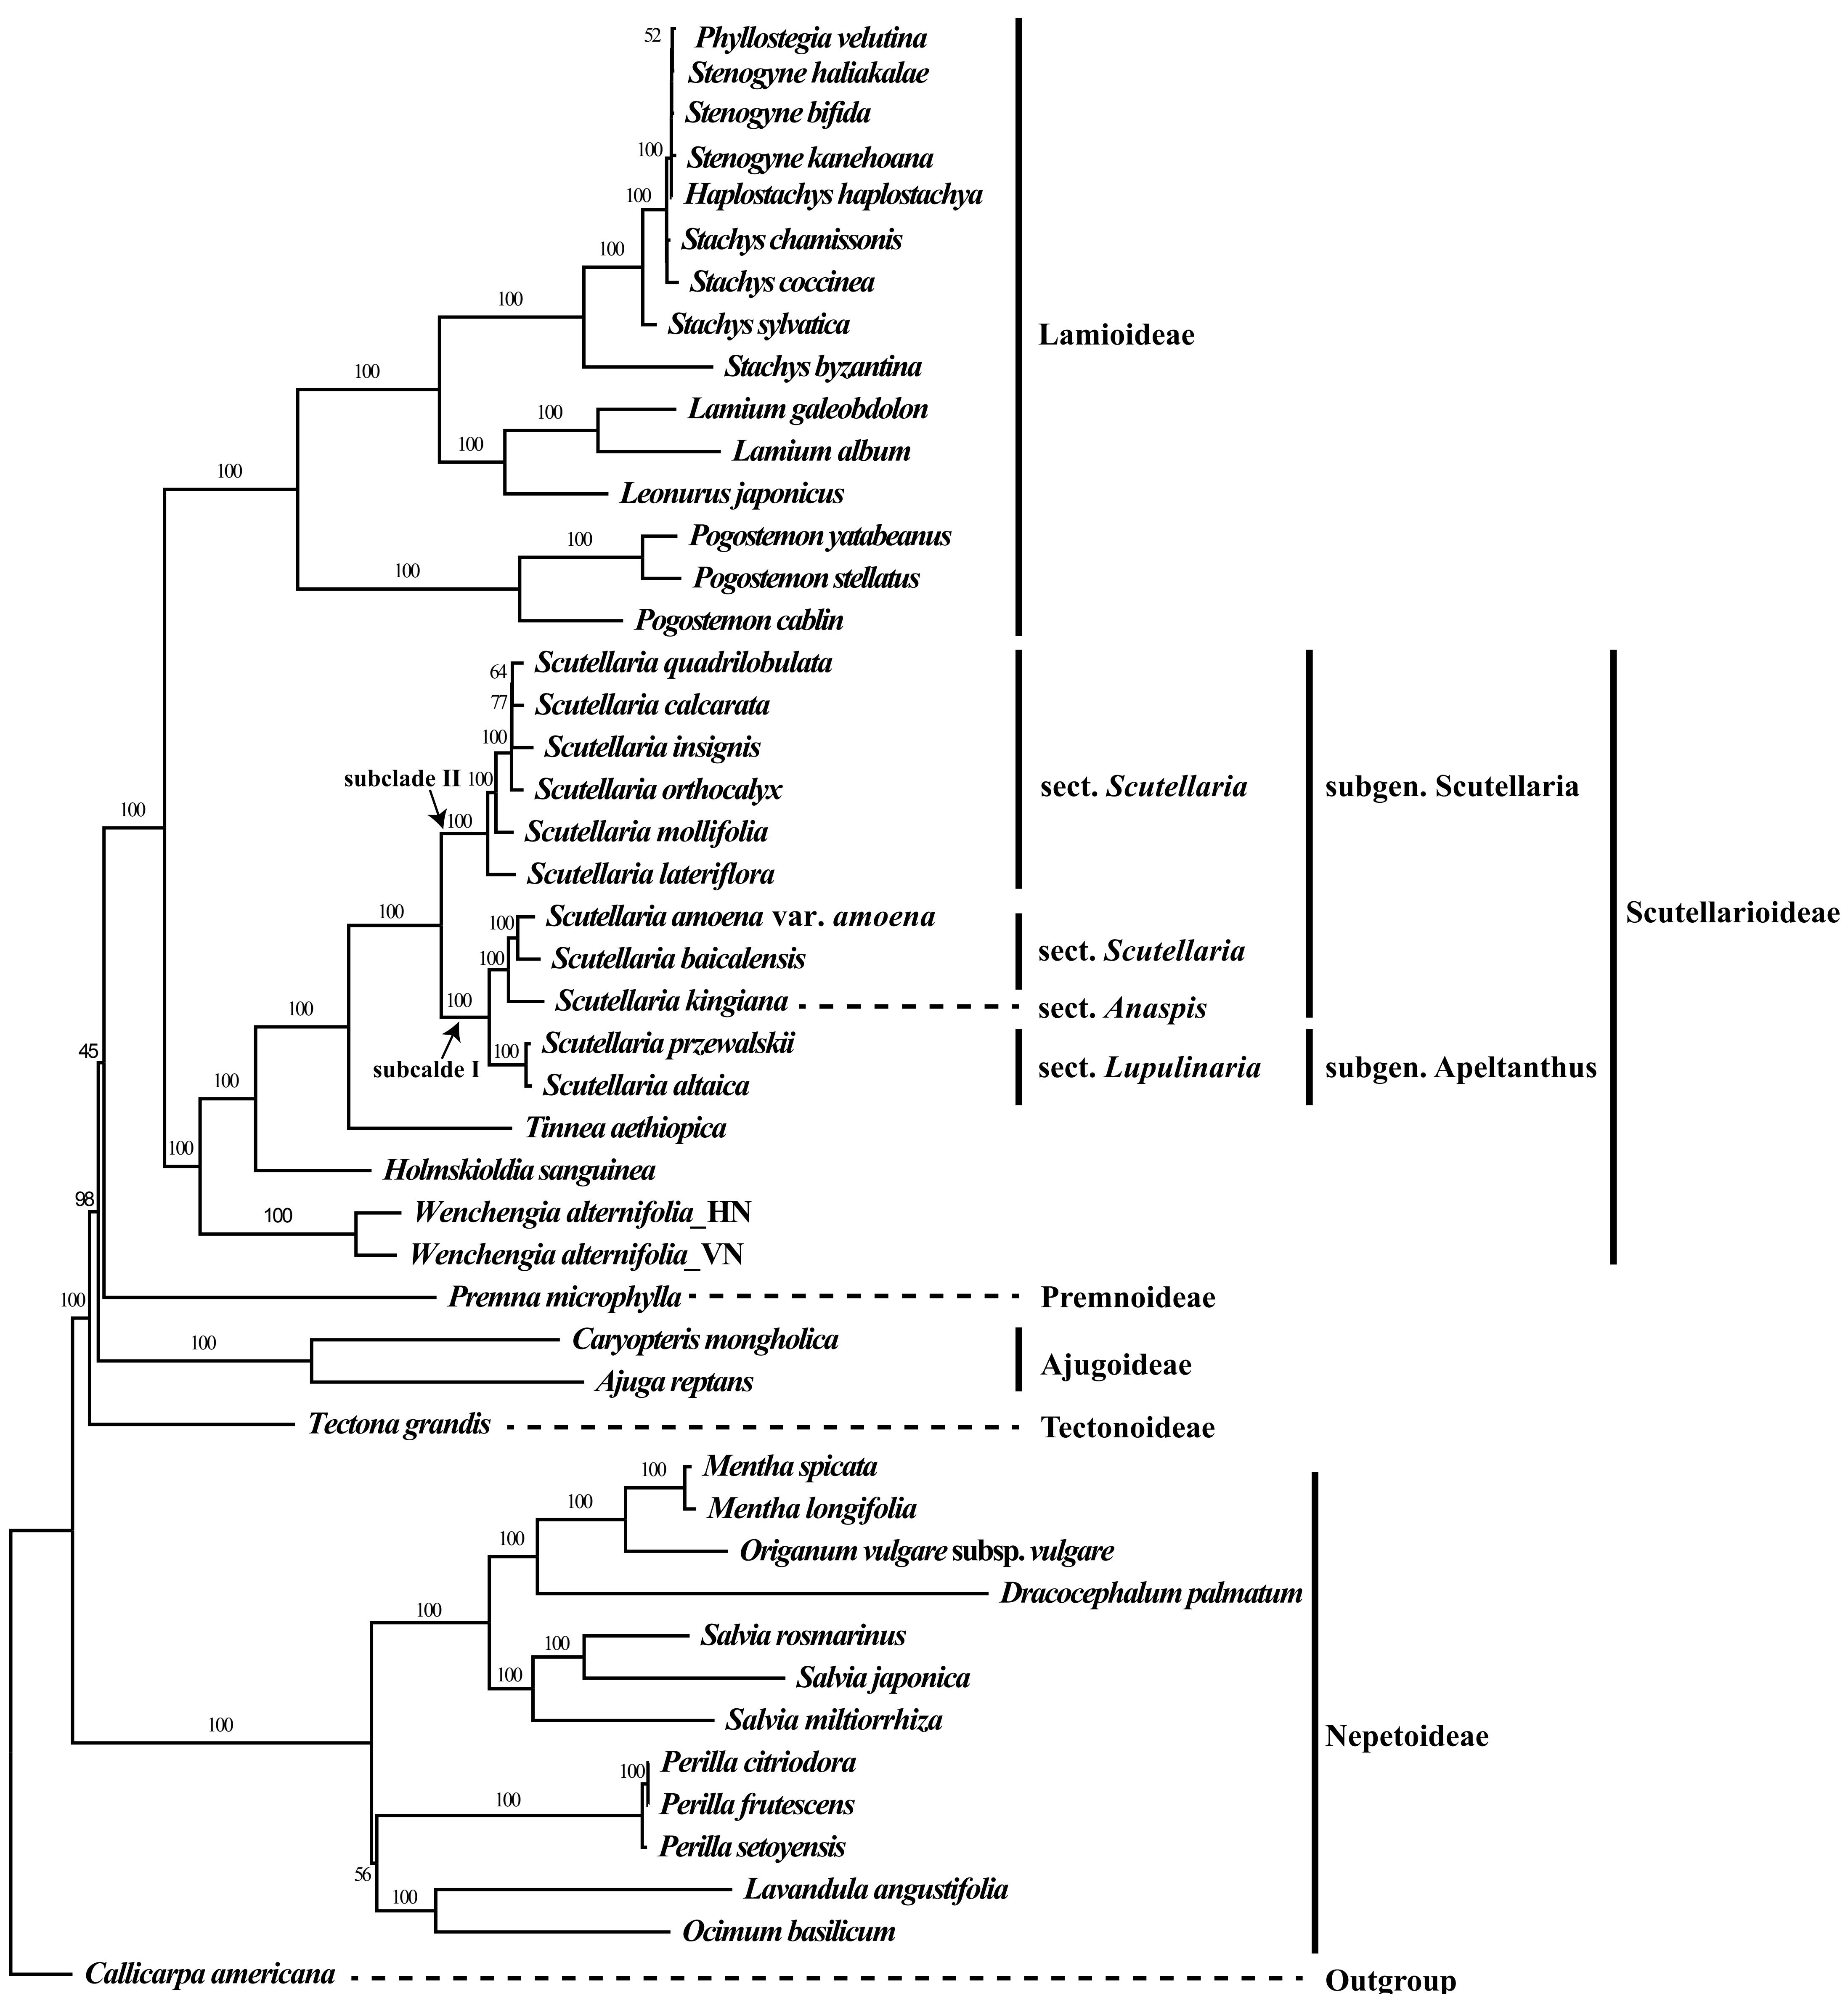

Supplement: pone.0232602.s007.pdf [file pone.0232602.s007.pdf]
